# Supplementary material for: Fluconazole‐induced actin cytoskeleton remodeling requires phosphatidylinositol 3‐phosphate 5‐kinase in the pathogenic yeast Candida glabrata
Source: PubMed Central journal article supplement (PMC6221164; doi:10.1111/mmi.14110), 2018-10-03

1 **Supporting Information**

2 **Fluconazole-induced actin cytoskeleton remodeling requires phosphatidylinositol 3-**  
3 **phosphate 5-kinase in the pathogenic yeast *Candida glabrata***

4 Priyanka Bhakt, Raju Shivarathri, Deepak Kumar Choudhary, Sapan Borah and Rupinder Kaur

5

6 **Supplementary material includes three tables (Supplementary Tables 1-3) and eight figures**  
7 **(Supplementary Figures 1-8).**

8

9 **Supplementary Tables**

10 **Table S1:** Tn7 mutants identified in the genetic screen for altered fluconazole susceptibility  
11 profiles.

12 **Table S2:** List of strains and plasmids used in the study

13 **Table S3:** List of primers used in the study

14

15 **Legends to Supplementary Figures**

16 **Figure S1: The *Cgfab1*Δ mutant responds to azole stress through activation of the MDR**  
17 **pathway.**

18 **A.** qPCR-based measurement of *CgCDR1* and *CgPDR1* transcript levels in log-phase *wt* and  
19 *Cgfab1*Δ cultures. Data (mean ± SEM, n = 3-5) represent fold change in expression in  
20 fluconazole-treated samples compared to untreated cultures. \*\*, p<0.01; \*\*\*, p<0.001,  
21 paired two-tailed Student's t-test.

22 **B.** Glucose-induced rhodamine 6G (R6G) efflux by 4 h fluconazole-treated and untreated log  
23 phase cultures. Glucose-starved cells were preloaded with 10 μM R6G for 2 h at 30°C and

24 the supernatant fluorescence, read-out of R6G extracellular concentration, was measured  
25 after 20 min of glucose (2 mM) addition. Data (mean  $\pm$  SEM, n = 6-8) are expressed in  
26 arbitrary units (AU).

27 **C.** Serial dilution cell spotting assay showing azole resistance-conferring ability of the  
28 *CgPDR1-GOF* (*CgPDR1<sup>L280F</sup>*) allele in the *Cgfab1 $\Delta$*  mutant. Fluconazole was used at a  
29 concentration of 16  $\mu$ g/ml (FLC-16) and 64  $\mu$ g/ml (FLC-64).

30 **Figure S2: CgFab1 is required for vacuole functions.**

31 **A.** Schematic illustration of domain structure of the CgFab1 protein as predicted by the NCBI  
32 Conserved Domain tool. The diagram is not drawn to scale.

33 **B.** Serial dilution cell spotting assay illustrating sensitivity of the *Cgfab1 $\Delta$*  mutant to  
34 manganese chloride ( $\text{MnCl}_2$ ; 3 mM) and zinc chloride ( $\text{ZnCl}_2$ ; 8 mM).

35 **C.** Western blot analysis of whole-cell extracts (40  $\mu$ g) from indicated 12 h YPD-grown *C.*  
36 *glabrata* cells.

37 **D.** Serial dilution spotting analysis illustrating CgFab1-GFP-mediated complementation of  
38 fluconazole (16  $\mu$ g/ml; FLC), clotrimazole (2  $\mu$ g/ml; CTZ) and manganese chloride (3  
39 mM;  $\text{MnCl}_2$ ) sensitivity of the *Cgfab1 $\Delta$*  mutant.

40 **E.** Serial dilution spotting analysis illustrating growth of *Cgfab1 $\Delta$* , *Cgvps15 $\Delta$* , *Cgvps34 $\Delta$*  and  
41 *Cgyps1-11 $\Delta$*  mutants in the CAA medium lacking or containing fluconazole (16  $\mu$ g/ml;  
42 FLC) and clotrimazole (2  $\mu$ g/ml; CTZ). Plate images were captured after growth at 30°C  
43 for 1-2 days.

44 **Figure S3: Fluconazole treatment downregulates CgFABI gene expression.**

45 **A.** qPCR-based measurement of *CgFABI* transcript levels in fluconazole-treated *wt* cultures.  
46 Data (mean  $\pm$  SEM, n = 5) were normalized against the *CgGAPDH* mRNA control, and

47 represent fold change in expression in fluconazole-treated samples (FLC) compared to  
48 untreated cultures (CAA). \*\*, p<0.01, paired two-tailed Student's t-test.

49 **B.** Jasplakinolide treatment did not rescue large-vacuole phenotype of the *Cgfab1Δ* mutant.  
50 Log phase *Cgfab1Δ* cultures were either grown in the CAA medium (CAA) or CAA  
51 medium containing 750 ng/ml of jasplakinolide (JSP) at 30°C. After 2 h, cells were  
52 collected, stained with FM4-64 and imaged using confocal microscopy. Bar = 2 μm.

53 **Figure S4: Varied azole susceptibility of the clinical isolates of *C. glabrata*.** Serial dilution cell  
54 spotting analysis showing fluconazole susceptibility of *C. glabrata* clinical isolates. 4 isolates  
55 showed *wt*-like sensitivity to fluconazole (16 μg/ml; FLC-16), while 6 isolates displayed resistance  
56 to fluconazole [(64 μg/ml; FLC-64 (FLC-R)].

57 **Figure S5: CgCap2 is required for organization of the actin cytoskeletal network.**

58 **A.** Representative confocal images showing loss of actin cables and rounded morphology in  
59 rhodamine-phalloidin-labelled *Cgcap2Δ* cells. White and yellow arrows mark actin cables  
60 and patches, respectively. Bar = 1 μm.

61 **B.** Serial dilution cell spotting assay showing azole resistance in the *Cgcap2Δ* mutant.  
62 Fluconazole [(FLC-16 (16 μg/ml), FLC-32 (32 μg/ml) and FLC-64 (64 μg/ml)], and  
63 clotrimazole [(CTZ-2 (2 μg/ml) and CTZ-6 (6 μg/ml)] were used. Ectopic expression of  
64 CgCap2-GFP reverted the azole resistance in the *Cgcap2Δ* mutant to *wt*-levels.

65 **Figure S6: Actin cytoskeletal-defective mutants display increased intracellular sterol**  
66 **accumulation.**

67 **A.** Representative confocal images showing decreased intracellular sterol accumulation in  
68 *Cgfab1Δ* cells treated with jasplakinolide (750 ng/ml; JSP) for 2 h. Fluconazole  
69 concentration used was 16 μg/ml. For each sample, a minimum of 200 cells displaying

70 filipin fluorescence were counted, and data (mean  $\pm$  SEM) are presented, as the percentage  
71 of cells with intracellular filipin signal, on the right side of panels. \*,  $p < 0.05$ ; \*\*,  $p < 0.01$ .  
72 Unpaired, two-tailed, Student's t-test. Bar = 1  $\mu\text{m}$ .

73 **B.** CAA liquid growth assay-based analysis of amphotericin B (3  $\mu\text{g/ml}$ ) resistance in the  
74 *Cgfab1 $\Delta$*  mutant.

75 **C.** Representative confocal images showing higher levels of intracellular sterols in filipin-  
76 stained *Cgbem2 $\Delta$* , *Cgbnr1 $\Delta$ ::Tn7* and *Cgpan1 $\Delta$ ::Tn7*, mutants. The *Cgcdr1 $\Delta$*  mutant did  
77 not accumulate sterols intracellularly. Red arrows indicate intracellular filipin staining. Bar  
78 = 1  $\mu\text{m}$ .

79 **D.** qPCR-based measurement of indicated *CgERG* gene transcript levels in *wt* and *Cgfab1 $\Delta$*   
80 cultures. Data (mean  $\pm$  SEM,  $n = 3-5$ ) were normalized against the *CgGAPDH* mRNA  
81 control, and represent fold change in expression in the *Cgfab1 $\Delta$*  mutant compared to the *wt*  
82 strain.

83 **Figure S7: Molecular docking analysis of CgCof1 with PI(3,5)P2 and CgAct1 using the**  
84 **Autodock Vina and Z-DOCK servers, respectively.** CgAct1 and PI(3,5)P2 showed binding to  
85 same residues (Lys36, Arg96, Ser103 and Ser104) in CgCof1.

86 **Figure S8: Cgvac7 $\Delta$  and Cgvac14 $\Delta$  mutants contain large vacuole and are azole sensitive.**

87 **A.** Serial dilution cell spotting assay showing sensitivity of *Cgvac7 $\Delta$*  and *Cgvac14 $\Delta$*  mutants  
88 towards azoles. Fluconazole (FLC), clotrimazole (CTZ) and ketoconazole (KTZ) were  
89 used at a concentration of 16  $\mu\text{g/ml}$ , 2  $\mu\text{g/ml}$  and 4  $\mu\text{g/ml}$ , respectively.

90 **B.** Representative confocal images of FM4-64 stained, YPD-grown log-phase cultures of  
91 indicated *C. glabrata* strains. Bar = 2.0  $\mu\text{m}$ .

92        **C.** Liquid growth assay-based analysis of jasplakinolide (750 ng/ml; JSP)-mediated rescue of  
93            fluconazole (48 µg/ml; FLC) sensitivity.

94

**Table S1: Tn7 mutants identified in the genetic screen for altered fluconazole susceptibility profiles.**

| Gene name                                                              | CAGL ID                         | Tn7 insertion position (nt) | ORF length (nt) | Function of the <i>S. cerevisiae</i> ortholog                                                                                                                                         |
|------------------------------------------------------------------------|---------------------------------|-----------------------------|-----------------|---------------------------------------------------------------------------------------------------------------------------------------------------------------------------------------|
| <b><u>Mutants identified in the fluconazole resistance screen</u></b>  |                                 |                             |                 |                                                                                                                                                                                       |
| <b>Cellular protein modification process</b>                           |                                 |                             |                 |                                                                                                                                                                                       |
| <i>SET2</i>                                                            | <i>CAGL0C00297g</i>             | 1428                        | 2151            | Histone methyltransferase with a role in transcriptional elongation; methylates H3 lysine 36 (H3K36)                                                                                  |
| <i>HST1</i>                                                            | <i>CAGL0C05357g<sup>#</sup></i> | 802                         | 1530            | NAD <sup>+</sup> -dependent histone deacetylase                                                                                                                                       |
| <i>SET4</i>                                                            | <i>CAGL0G04499g</i>             | 36                          | 1053            | Protein of unknown function; contains a SET domain                                                                                                                                    |
| <b>Organelle organization</b>                                          |                                 |                             |                 |                                                                                                                                                                                       |
| <i>HM11</i>                                                            | <i>CAGL0I07623g</i>             | 902                         | 2136            | Mitochondrial inner membrane localized ATP-dependent DNA helicase                                                                                                                     |
| <i>CCE1</i>                                                            | <i>CAGL0L05346g</i>             | 118                         | 996             | Mitochondrial cruciform cutting endonuclease; cleaves Holliday junctions formed during recombination mitochondrial DNA                                                                |
| <b>Response to stress</b>                                              |                                 |                             |                 |                                                                                                                                                                                       |
| <i>SWI4</i>                                                            | <i>CAGL0A04565g</i>             | 2185                        | 3126            | DNA binding component of the SBF complex (Swi4-Swi6)                                                                                                                                  |
| <i>BDF1</i>                                                            | <i>CAGL0C02541g</i>             | 568                         | 1932            | Protein involved in transcription initiation; functions at TATA-containing promoters; associates with the basal transcription factor TFIID                                            |
| <b>Filamentous growth</b>                                              |                                 |                             |                 |                                                                                                                                                                                       |
| <i>GLE1</i>                                                            | <i>CAGL0J09636g</i>             | 756                         | 1593            | Cytoplasmic nucleoporin required for polyadenylated mRNA export; contains a nuclear export signal                                                                                     |
| <b>Protein catabolic process</b>                                       |                                 |                             |                 |                                                                                                                                                                                       |
| <i>YTA12</i>                                                           | <i>CAGL0J01353g</i>             | 2343                        | 2484            | Mitochondrial inner membrane m-AAA protease component; mediates degradation of misfolded or unassembled proteins                                                                      |
| <b>RNA metabolic process</b>                                           |                                 |                             |                 |                                                                                                                                                                                       |
| <i>MUD2</i>                                                            | <i>CAGL0L05038g</i>             | 1159                        | 1542            | Protein involved in early pre-mRNA splicing; component of the pre-mRNA-U1 snRNP complex, the commitment complex                                                                       |
| <b>Vesicle-mediated transport</b>                                      |                                 |                             |                 |                                                                                                                                                                                       |
| <i>CHC1</i>                                                            | <i>CAGL0A03718g</i>             | 3608                        | 4959            | Clathrin heavy chain; subunit of the major coat protein involved in intracellular protein transport and endocytosis                                                                   |
| <b><u>Mutants identified in the fluconazole sensitivity screen</u></b> |                                 |                             |                 |                                                                                                                                                                                       |
| <b>Lipid metabolic process</b>                                         |                                 |                             |                 |                                                                                                                                                                                       |
| <i>ERG4</i>                                                            | <i>CAGL0A00429g<sup>#</sup></i> | 170                         | 1395            | C-24(28) sterol reductase; catalyzes the final step in ergosterol biosynthesis                                                                                                        |
| <i>UPC2</i>                                                            | <i>CAGL0C01199g<sup>#</sup></i> | 838                         | 2769            | Sterol regulatory element binding protein; induces sterol biosynthetic genes                                                                                                          |
| <i>PDR16</i>                                                           | <i>CAGL0J07436g<sup>#</sup></i> | 884                         | 1035            | Phosphatidylinositol transfer protein (PITP); controlled by the multiple drug resistance regulator Pdr1                                                                               |
| <i>FAB1</i>                                                            | <i>CAGL0K10384g</i>             | 5681                        | 6315            | 1-phosphatidylinositol-3-phosphate 5-kinase; vacuolar membrane kinase that generates phosphatidylinositol (3,5)P <sub>2</sub> , which is involved in vacuolar sorting and homeostasis |
| <i>BST1</i>                                                            | <i>CAGL0K12408g</i>             | 1751                        | 3036            | GPI inositol deacylase of the endoplasmic reticulum; negatively regulates COPII vesicle formation                                                                                     |
| <b>RNA metabolic process</b>                                           |                                 |                             |                 |                                                                                                                                                                                       |
| <i>PGD1</i>                                                            | <i>CAGL0A01325g<sup>#</sup></i> | 1252                        | 1434            | Subunit of the RNA polymerase II mediator complex; associates with core polymerase subunits to form the RNA polymerase II holoenzyme                                                  |
| <i>MED2</i>                                                            | <i>CAGL0C04477g<sup>#</sup></i> | 318                         | 1107            | Subunit of the RNA polymerase II mediator complex; associates with core polymerase subunits to form the RNA polymerase II holoenzyme                                                  |
| <i>HF11</i>                                                            | <i>CAGL0H00616g</i>             | 1113                        | 1356            | Adaptor protein required for structural integrity of the histone acetyltransferase-coactivator SAGA complex                                                                           |
| <i>SLT2</i>                                                            | <i>CAGL0J00539g<sup>#</sup></i> | 557                         | 1467            | Serine/threonine MAP kinase of the PKC MAPK pathway                                                                                                                                   |
| <b>Transport</b>                                                       |                                 |                             |                 |                                                                                                                                                                                       |
| <i>PDR6</i>                                                            | <i>CAGL0A00385g</i>             | 1503                        | 3210            | Karyopherin beta; responsible for import of the Toa1-Toa2 complex into the nucleus                                                                                                    |
| <i>ITR2</i>                                                            | <i>CAGL0I07447g</i>             | 1446                        | 1713            | Myo-inositol transporter; member of the sugar transporter superfamily                                                                                                                 |
| <i>THO2</i>                                                            | <i>CAGL0J05654g</i>             | 2416                        | 4707            | Subunit of the THO complex; THO is required for efficient transcription elongation and involved in transcriptional elongation-associated recombination                                |

|                                           |                                 |      |      |                                                                                                                                                                                        |
|-------------------------------------------|---------------------------------|------|------|----------------------------------------------------------------------------------------------------------------------------------------------------------------------------------------|
| <i>FUN26</i>                              | <i>CAGL0J08712g</i>             | 611  | 1242 | High affinity, broad selectivity, nucleoside/nucleobase transporter; vacuolar membrane-localized transporter                                                                           |
| <b>Cytoskeleton organization</b>          |                                 |      |      |                                                                                                                                                                                        |
| <i>BNR1</i>                               | <i>CAGL0H06765g<sup>#</sup></i> | 1747 | 3885 | Formin; nucleates the formation of linear actin filaments; involved in processes such as budding and mitotic spindle orientation which require the formation of polarized actin cables |
| <i>BEM2</i>                               | <i>CAGL0I06512g<sup>#</sup></i> | 1997 | 6360 | Rho GTPase activating protein (RhoGAP); involved in the control of cytoskeleton organization and cellular morphogenesis; required for bud emergence                                    |
| <i>PAN1</i>                               | <i>CAGL0J01892g<sup>#</sup></i> | 698  | 4125 | Part of actin cytoskeleton-regulatory complex Pan1-Sla1-End3; associates with actin patches on cell cortex; promotes protein-protein interactions essential for endocytosis            |
| <b>Regulation of nitrogen utilization</b> |                                 |      |      |                                                                                                                                                                                        |
| <i>VID30</i>                              | <i>CAGL0I04114g</i>             | 1174 | 2733 | Central component of GID Complex, involved in FBPase degradation                                                                                                                       |
| <i>URE2</i>                               | <i>CAGL0J07392g</i>             | 224  | 1068 | Nitrogen catabolite repression transcriptional regulator; inhibits GLN3 transcription in good nitrogen source                                                                          |
| <b>Protein folding</b>                    |                                 |      |      |                                                                                                                                                                                        |
| <i>EMC1</i>                               | <i>CAGL0B00660g</i>             | 1459 | 2241 | Member of conserved endoplasmic reticulum membrane complex; involved in efficient folding of proteins in the ER                                                                        |
| <b>Biofilm formation</b>                  |                                 |      |      |                                                                                                                                                                                        |
| <i>NRG2</i>                               | <i>CAGL0L07480g</i>             | 630  | 945  | Transcriptional repressor; mediates glucose repression and negatively regulates filamentous growth                                                                                     |
| <b>Miscellaneous</b>                      |                                 |      |      |                                                                                                                                                                                        |
|                                           | <i>CAGL0A00165g</i>             | 16   | 840  |                                                                                                                                                                                        |
| <i>DNM1</i>                               | <i>CAGL0D05808g</i>             | 8    | 2331 | Dynamin-related GTPase involved in mitochondrial organization; required for mitochondrial fission and inheritance                                                                      |
| <i>EFR3</i>                               | <i>CAGL0F03773g</i>             | 1637 | 2250 | Protein required for Stt4-containing PI kinase complex localization                                                                                                                    |
| <i>SAS2</i>                               | <i>CAGL0K03773g</i>             | 793  | 1062 | Histone acetyltransferase (HAT) catalytic subunit of the SAS complex; acetylates free histones and nucleosomes and regulates transcriptional silencing                                 |
| <i>NVJ2</i>                               | <i>CAGL0K08030g</i>             | 657  | 2277 | Lipid-binding ER protein, enriched at nucleus-vacuolar junctions                                                                                                                       |
| <i>RPH1</i>                               | <i>CAGL0L11880g</i>             | 1456 | 2943 | JmjC domain-containing histone demethylase; targets tri- and dimethylated H3K36                                                                                                        |

Functional classification was performed using the GO Slim Mapper tool at CGD (<http://www.candidagenome.org/cgi-bin/GO/goTermMapper>).

<sup>#</sup>Genes previously implicated in azole tolerance.

**Table S2: List of strains and plasmids used in the study.**

| Yeast strain | Genotype                                                                               | References                        |
|--------------|----------------------------------------------------------------------------------------|-----------------------------------|
| BG2          | Clinical isolate                                                                       | Fidel <i>et al.</i> , 1996        |
| YRK19        | <i>ura3Δ::Tn903 G418R</i> (BG14)                                                       | Cormack and Falkow, 1999          |
| YRK20        | <i>URA3</i> (BG462)                                                                    | Orta-Zavalza <i>et al.</i> , 2013 |
| YRK531       | <i>URA3 Cgbem2Δ::nat1</i>                                                              | Borah <i>et al.</i> , 2011        |
| YRK695       | <i>URA3 Cgyvs15Δ::nat1</i>                                                             | Rai <i>et. al.</i> , 2015         |
| YRK710       | <i>URA3 Cgyvs34Δ::nat1</i>                                                             | Rai <i>et. al.</i> , 2015         |
| YRK870       | <i>C. glabrata</i> isolate from the oral mucosa of a diabetic patient                  | Gift from Dr. Shukla Das          |
| YRK981       | <i>URA3 Cgprc1Δ::nat1</i>                                                              | Bairwa <i>et al.</i> , 2014       |
| YRK1070      | <i>ura3Δ::Tn903 G418R Cgfab1Δ::nat1</i>                                                | This study                        |
| YRK1139      | <i>ura3Δ::Tn903 G418R Cgfab1Δ::nat1/pRK1033</i>                                        | This study                        |
| YPS1205      | <i>URA3 Cgyvs1-11Δ::hph</i>                                                            | Kaur <i>et. al.</i> , 2007        |
| YRK1287      | <i>URA3 Cgfab1Δ::nat1</i>                                                              | This study                        |
| YRK1297      | <i>Cgpan1Δ::Tn7</i>                                                                    | Borah <i>et al.</i> , 2011        |
| YRK1413      | <i>ura3Δ::Tn903 G418R</i> (YRK19)/ <i>pRK1018</i>                                      | This study                        |
| YRK1414      | <i>ura3Δ::Tn903 G418R Cgfab1Δ::nat1/pRK1018</i>                                        | This study                        |
| YRK1433      | <i>ura3Δ::Tn903 G418R Cgfab1Δ::nat1/pRK1107</i>                                        | This study                        |
| YRK1519      | YRK20/ <i>CgPDR1<sup>L280F</sup></i>                                                   | This study                        |
| YRK1520      | <i>ura3Δ::Tn903 G418R Cgfab1Δ/CgPDR1<sup>L280F</sup></i>                               | This study                        |
| YRK1533      | <i>ura3Δ::Tn903 G418R Cgfab1Δ::nat1/pRK1144</i>                                        | This study                        |
| YRK1601      | <i>URA3 Cgvac14Δ::nat1</i>                                                             | This study                        |
| YRK1692      | <i>URA3 Cgvac7Δ::nat1</i>                                                              | This study                        |
| YRK1966      | <i>Cgbnr1Δ::Tn7</i>                                                                    | Borah <i>et al.</i> , 2011        |
| YRK2144      | <i>ura3Δ::Tn903 G418R</i> (YRK19)/ <i>pRK1409</i>                                      | This study                        |
| YRK2148      | <i>ura3Δ::Tn903 G418R Cgfab1Δ::nat1/pRK1409</i>                                        | This study                        |
| YRK2171      | <i>ura3Δ::Tn903 G418R</i> (YRK19)/ <i>pRK1411</i>                                      | This study                        |
| YRK2181      | <i>ura3Δ::Tn903 G418R Cgfab1Δ::nat1/pRK1411</i>                                        | This study                        |
| YRK2359      | <i>ura3Δ::Tn903 G418R</i> (YRK19)/ <i>pRK1493</i>                                      | This study                        |
| YRK2285      | <i>ura3Δ::Tn903 G418R</i> (YRK19)/ <i>pRK1476</i>                                      | This study                        |
| YRK2287      | <i>C. glabrata</i> isolate from the vitreous fluid of patient with ocular infection    | Gift from Dr. S. Shivaji          |
| YRK2288      | <i>C. glabrata</i> isolate from the corneal scrapping of patient with ocular infection | Gift from Dr. S. Shivaji          |
| YRK2289      | <i>C. glabrata</i> isolate from the vitreous fluid of patient with ocular infection    | Gift from Dr. S. Shivaji          |
| YRK2290      | <i>C. glabrata</i> isolate from the vitreous fluid of patient with ocular infection    | Gift from Dr. S. Shivaji          |
| YRK2291      | <i>C. glabrata</i> isolate from the corneal scrapping of patient with ocular infection | Gift from Dr. S. Shivaji          |



| YRK2301 | <i>ura3Δ::Tn903 G418R Cgcap2Δ::nat1</i>                                                                                                                                                                                           | This study                          |
|---------|-----------------------------------------------------------------------------------------------------------------------------------------------------------------------------------------------------------------------------------|-------------------------------------|
| YRK2315 | <i>ura3Δ::Tn903 G418R Cgcap2Δ::nat1/pRK1409</i>                                                                                                                                                                                   | This study                          |
| YRK2340 | <i>C. glabrata</i> isolate from the blood                                                                                                                                                                                         | Gift from Dr. Arunaloke Chakrabarti |
| YRK2341 | <i>C. glabrata</i> isolate from the blood                                                                                                                                                                                         | Gift from Dr. Arunaloke Chakrabarti |
| YRK2342 | <i>C. glabrata</i> isolate from the blood                                                                                                                                                                                         | Gift from Dr. Arunaloke Chakrabarti |
| YRK2344 | <i>C. glabrata</i> isolate from the ascitic fluid                                                                                                                                                                                 | Gift from Dr. Arunaloke Chakrabarti |
| Plasmid | Description                                                                                                                                                                                                                       | References                          |
| pRK74   | A CEN-ARS plasmid (pGRB2.2) of <i>C. glabrata</i> carrying <i>S. cerevisiae URA3</i> as a selection marker. MCS sites are flanked by <i>S. cerevisiae PGK1</i> promoter at one end and by 3' UTR of <i>HIS3</i> at the other end. | Frieman <i>et al.</i> , 2002        |
| pRK949  | pSF67, plasmid with CgPDR1 hyperactive allele ( <i>CgPDR1<sup>L280F</sup></i> ) (DSY565)                                                                                                                                          | Sanglard laboratory                 |
| pRK1018 | pGRB2.3 plasmid                                                                                                                                                                                                                   | Addgene (Plasmid #45343)            |
| pRK1033 | <i>CgFAB1</i> (6.31 kb) cloned in BamHI-SalI sites of pRK74 plasmid                                                                                                                                                               | This study                          |
| pRK1107 | <i>CgFAB1</i> (6.31 kb) cloned in BamHI-XmaI sites of pGRB2.3 plasmid (pRK1018)                                                                                                                                                   | This study                          |
| pRK1144 | <i>CgFAB1<sup>GKSG→VKSV</sup></i> cloned in the pRK74 plasmid                                                                                                                                                                     | This study                          |
| pRK1349 | SFB (S-protein-FLAG epitope-streptavidin-binding peptide) tag cloned in PCU-PDC1 (ADD Gene #45323) in <i>EcoRI-SalI</i> sites                                                                                                     | Kaur Laboratory                     |
| pRK1409 | <i>CgCAP2</i> (0.813 kb) cloned in SpeI-XmaI sites of pGRB2.3 plasmid (pRK1018)                                                                                                                                                   | This study                          |
| pRK1411 | <i>CgCOF1</i> (0.908 kb) cloned in SpeI-BamHI sites of pGRB2.3 plasmid (pRK1018)                                                                                                                                                  | This study                          |
| pRK1476 | <i>CgCOF1</i> (0.908 kb) cloned in SpeI-BamHI sites of pRK1349 plasmid                                                                                                                                                            | This study                          |
| pRK1493 | <i>CgCAP2</i> (0.813 kb) cloned in SpeI-XmaI sites of pRK1349 plasmid                                                                                                                                                             | This study                          |
| pRK1494 | <i>CgCOF1</i> cloned in pET28a vector at <i>EcoRI-XhoI</i> sites of pET28-a plasmid                                                                                                                                               | This study                          |

## References

Bairwa, G., Rasheed, M., Taigwal, R., Sahoo, R., and Kaur, R. (2014) GPI (glycosylphosphatidylinositol)-linked aspartyl proteases regulate vacuole homeostasis in *Candida glabrata*. *Biochem J* **458**: 323–334.

Borah, S., Shivarathri, R., and Kaur, R. (2011) The Rho1 GTPase-activating protein CgBem2 is required for survival of azole stress in *Candida glabrata*. *J Biol Chem* **286**: 34311–34324.

Cormack, B.P., and Falkow, S. (1999) Efficient homologous and illegitimate recombination in the opportunistic yeast pathogen *Candida glabrata*. *Genetics* **151**: 979–987.

Fidel, P.L., Cutright, J.L., Tait, L., and Sobel, J.D. (1996) A murine model of *Candida glabrata* vaginitis. *J Infect Dis* **173**: 425–431.

Frieman, M.B., McCaffery, J.M., and Cormack, B.P. (2002) Modular domain structure in the *Candida glabrata* adhesin Epa1p, a beta1,6 glucan-cross-linked cell wall protein. *Mol Microbiol* **46**: 479–492.

Kaur, R., Ma, B., and Cormack BP (2007) A family of glycosylphosphatidylinositol-linked aspartyl proteases is required for virulence of *Candida glabrata*. *Proc Natl Acad Sci USA* **104**: 7628-7633

Orta-Zavalza, E., Guerrero-Serrano, G., Gutierrez-Escobedo, G., Canas-Villamar, I., Juarez-Cepeda, J., Castano, I., and Las Penas, A. De (2013) Local silencing controls the oxidative stress response and the multidrug resistance in *Candida glabrata*. *Mol Microbiol* **88**: 1135–1148.

Rai, M. N., Sharma, V., Balusu, S., and Kaur, R. 2015. An essential role for phosphatidylinositol 3-kinase in the inhibition of phagosomal maturation, intracellular survival and virulence in *Candida glabrata*. *Cell Microbiol* **17**: 269-287.

**Table S3: List of primers used in the study.**

| Primer                                    | Sequence (5'→3')                          | Description                                |
|-------------------------------------------|-------------------------------------------|--------------------------------------------|
| <b>For generation of deletion strains</b> |                                           |                                            |
| OgRK986                                   | CGTCCGCAAATCTTCATCT                       | <i>CgFAB1</i> 5'UTR Forward                |
| OgRK987                                   | GCGTCGACCTGCAGCGTACGATAGGCCAACGCAACTCATT  | <i>CgFAB1</i> 5'UTR Reverse                |
| OgRK988                                   | CGACGGTGTCGGTCTCGTAGCACCAACTGCCGTGTAAGGT  | <i>CgFAB1</i> 3'UTR Forward                |
| OgRK989                                   | ATGACAGAAATAGCGCAGCA                      | <i>CgFAB1</i> 3'UTR Reverse                |
| OgRK990                                   | GAGTCATCGTCGCTCCATTC                      | <i>CgFAB1</i> 5' Integration check Forward |
| OgRK991                                   | TATTACCGCCTGCAACTCCT                      | <i>CgFAB1</i> 3' Integration check Reverse |
| OgRK1366                                  | CTGGAACGGATAAGCGAGAG                      | <i>CgFAB1</i> Internal check Forward       |
| OgRK1367                                  | TCAACTGCGTCCTTGACATC                      | <i>CgFAB1</i> Internal check Reverse       |
| OgRK1954                                  | GGATTGGATCAGCAAACCACTTA                   | <i>CgPDR1</i> 5' integration check         |
| OgRK1955                                  | ACAACCATGAAGACAGACAAAGA                   | <i>CgPDR1</i> 3' integration check         |
| OgRK2746                                  | CTTGAAAGAGTGGGTTCCAGAG                    | <i>CgCAP2</i> 5'UTR Forward                |
| OgRK2747                                  | GCGTCGACCTGCAGCGTACGCGTAAGGGAAGAAGCTCTGTG | <i>CgCAP2</i> 5'UTR Reverse                |
| OgRK2748                                  | CGACGGTGTCGGTCTCGTAGCCCACCAACAAAATGAAACTC | <i>CgCAP2</i> 3'UTR Forward                |
| OgRK2749                                  | CTCGGACCAAACCTCTGCATCTC                   | <i>CgCAP2</i> 3'UTR Reverse                |
| OgRK2750                                  | GCACTACTGAACGACTTGCCAC                    | <i>CgCAP2</i> 5' Integration check Forward |
| OgRK2751                                  | CTCGATCTCATAATCTTTGAC                     | <i>CgCAP2</i> 3' Integration check Reverse |
| OGRK 2653                                 | TGCTGCACTTGATCTGCTTC                      | <i>CgCAP2</i> Internal check Forward       |
| OGRK 2654                                 | ATGGTGATTCTGCAGATCC                       | <i>CgCAP2</i> Internal check Reverse       |
| OgRK2123                                  | CAGCACAGACTCCAACCTCTCCCTG                 | <i>CgVAC7</i> 5'UTR Forward                |
| OgRK2124                                  | GCGTCGACCTGCAGCGTACGCAACTTCTACCTTAGTGTGG  | <i>CgVAC7</i> 5'UTR Reverse                |
| OgRK2125                                  | CGACGGTGTCGGTCTCGTAGCGGTGAACTGCATTCCACC   | <i>CgVAC7</i> 3'UTR Forward                |
| OgRK2126                                  | CCTCGATACTTCACTAGACTAAGAG                 | <i>CgVAC7</i> 3'UTR Reverse                |
| OgRK2127                                  | CAGAGGACAGCAAAGGCTCAAC                    | <i>CgVAC7</i> Internal check Forward       |
| OgRK2128                                  | GAGCCCACTTCATTGTGTTCCG                    | <i>CgVAC7</i> Internal check Reverse       |
| OgRK2129                                  | GACCACTCACACCACCATACAG                    | <i>CgVAC7</i> 5' Integration check Forward |
| OgRK2130                                  | CGTTGTTATAAATATAGTCGGTAC                  | <i>CgVAC7</i> 3' Integration check Reverse |
| OgRK2131                                  | CCAGGACACTGACAAAAGGACCC                   | <i>CgVAC14</i> 5'UTR Forward               |
| OgRK2132                                  | GCGTCGACCTGCAGCGTACGGCTGATCCTGATCCAAGGTG  | <i>CgVAC14</i> 5'UTR Reverse               |
| OgRK2133                                  | CGACGGTGTCGGTCTCGTAGCACATGAATAGGATTATGAG  | <i>CgVAC14</i> 3'UTR Forward               |
| OgRK2134                                  | GCACATATGGACTCCAAGCGTC                    | <i>CgVAC14</i> 3'UTR Reverse               |
| OgRK2135                                  | CTTATGACGGCTCCTGAGCTT                     | <i>CgVAC14</i> Internal check Forward      |
| OgRK2136                                  | GTTGAACGCTTCAGACTGTGG                     | <i>CgVAC14</i> Internal check Reverse      |

|                                      |                                                              |                                                                 |
|--------------------------------------|--------------------------------------------------------------|-----------------------------------------------------------------|
| OgRK2137                             | GTATGCCACATCGGGAGAAAC                                        | <i>CgVAC14</i> 5' Integration check Forward                     |
| OgRK2138                             | GTGTTGCAATTATCAAGGCTCC                                       | <i>CgVAC14</i> 3' Integration check Reverse                     |
| <b>For gene cloning</b>              |                                                              |                                                                 |
| OgRK1177                             | CGCGGATCCATGGCTATTGGTCAAGGGACG                               | <i>CgFAB1</i> Cloning Forward                                   |
| OgRK1178                             | CGCGTCGACTTAGTTTGTATCTTGATACCA                               | <i>CgFAB1</i> Cloning Reverse, SDM 2 <sup>nd</sup> half Reverse |
| OgRK1903                             | CCGTGGATCCATGGCTATTGGTCAAGGGACGC                             | <i>CgFAB1</i> Cloning Forward                                   |
| OgRK1904                             | CGATCCCGGGGTTTGTATCTTGATACCATGGG                             | <i>CgFAB1</i> Cloning Reverse                                   |
| OgRK2628                             | CAGAACTAGTATGGATGAGAAATATGATGC                               | <i>CgCAP2</i> Cloning Forward                                   |
| OgRK2629                             | CTGTCCCGGGTAGATTTTGAAGACCCTTGAT                              | <i>CgCAP2</i> Cloning Reverse                                   |
| OgRK2630                             | CAGAACTAGTATGTCCAGATCAGGGTATGT                               | <i>CgCOF1</i> Cloning Forward                                   |
| OgRK2631                             | GTCTGGATCCGTGAGAACCAGCACCTCTGC                               | <i>CgCOF1</i> Cloning Reverse                                   |
| OgRK2739                             | GTAGAATTTCGATTACAAGGATGACGACGATAAGATGTCCAGA<br>TCAGGTGTTGCCG | <i>CgCOF1</i> Cloning in pET28a Forward                         |
| OgRK2740                             | GTACTCGAGTTAGTGAGAACCAGCACCTCTGC                             | <i>CgCOF1</i> Cloning in pET28a Reverse                         |
| <b>For qRT-PCR</b>                   |                                                              |                                                                 |
| OgRK127                              | TGCAGGACCAAGTCAGACAG                                         | <i>CgCDR1</i> Forward                                           |
| OgRK128                              | CTCATCGGAAGTAGGGTCCA                                         | <i>CgCDR1</i> Reverse                                           |
| OGRK133                              | ACGGTACCAAGCCATACGAG                                         | <i>CgERG11</i> Forward                                          |
| OGRK134                              | GAACACTGGGGTGGTCAAGT                                         | <i>CgERG11</i> Reverse                                          |
| OgRK135                              | AAAGGGAGTGACAGCGAGAA                                         | <i>CgPDR1</i> Forward                                           |
| OgRK136                              | CTCAATGGCGTCAATGGATGA                                        | <i>CgPDR1</i> Reverse                                           |
| OgRK191                              | TTTCAGAGTGCCAAGTGTTCG                                        | <i>CgGAPDH</i> Forward                                          |
| OgRK192                              | TGAAACAACAGCGTCTCAG                                          | <i>CgGAPDH</i> Reverse                                          |
| OGRK1535                             | GACCGTGAGAAGGTCTTGGA                                         | <i>CgERG1</i> Forward                                           |
| OGRK1536                             | TCACCACCACGTTGGAAATA                                         | <i>CgERG1</i> Reverse                                           |
| OGRK1537                             | TCGACGGTTACTTCCAATCC                                         | <i>CgERG3</i> Forward                                           |
| OGRK1538                             | TTGACAACCTGGTTGTTGGA                                         | <i>CgERG3</i> Reverse                                           |
| OGRK1539                             | CCCATTTTGGCATAACCAAG                                         | <i>CgERG4</i> Forward                                           |
| OGRK1540                             | AACCACAAGACATAGCCCAGA                                        | <i>CgERG4</i> Reverse                                           |
| OGRK1541                             | AAGGATCTTGCTGACGAGGA                                         | <i>CgERG6</i> Forward                                           |
| OGRK1542                             | CGACACCAACCTTTTCCATT                                         | <i>CgERG6</i> Reverse                                           |
| OGRK2015                             | CAGGATTCTAGTGATGAAGAG                                        | <i>CgFAB1</i> Forward                                           |
| OGRK2016                             | TGGAGGTGGAGGAGGAGTGGA                                        | <i>CgFAB1</i> Reverse                                           |
| <b>For site-directed mutagenesis</b> |                                                              |                                                                 |
| OgRK2025                             | GTCGTCCGATTAGAATATTCTG                                       | <i>CgFAB1</i> SDM 2 <sup>nd</sup> half Forward                  |
| OgRK2030                             | GTGGCATTCAAACGGTGTAATAATCTGTGAGTGGATTCTTAAAG<br>AC           | <i>CgFAB1</i> SDM 1 <sup>st</sup> half Forward                  |
| OgRK2031                             | GTCTTTAAGAATCCACTCACAGATTTTACACCGTTTGAATGCC<br>AC            | <i>CgFAB1</i> SDM 1 <sup>st</sup> half Reverse                  |

# Figure S1

## A

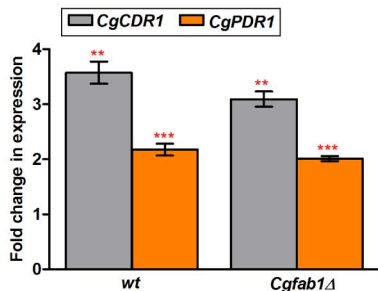

## B

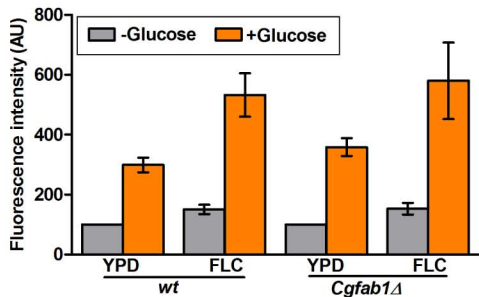

## C

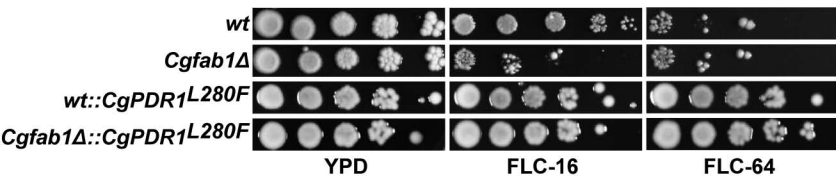

Figure S2

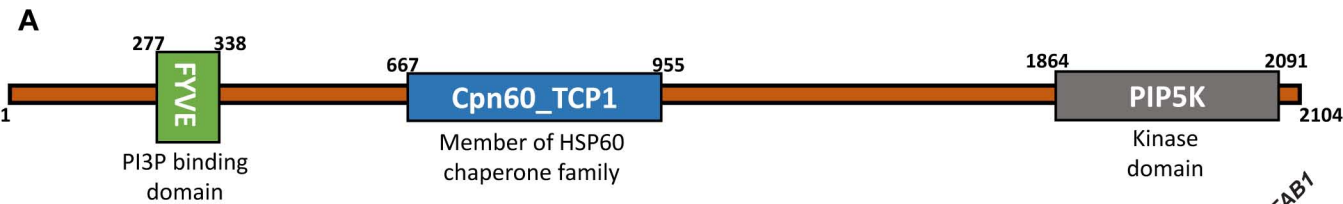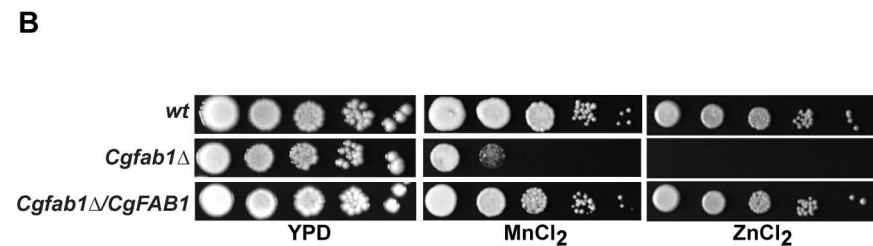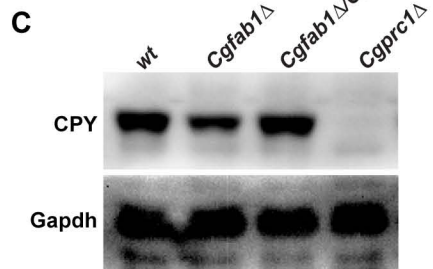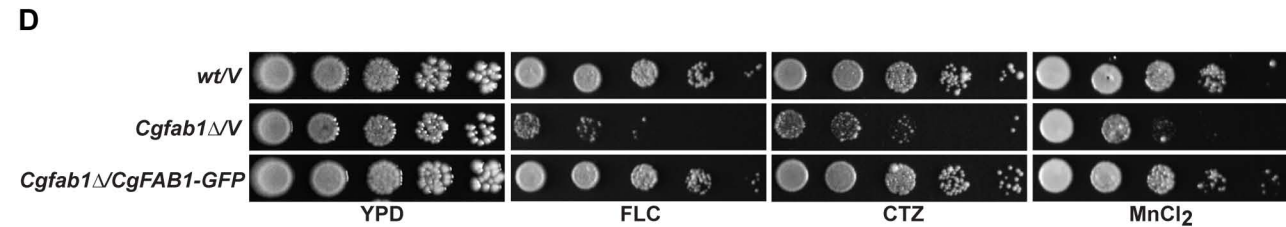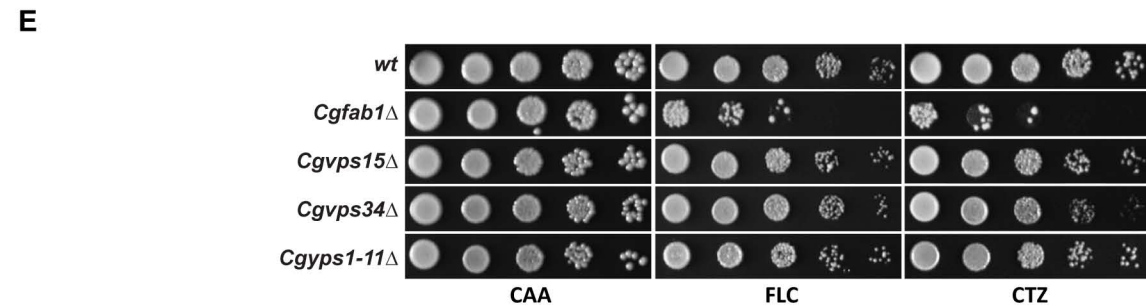

Figure S3

A

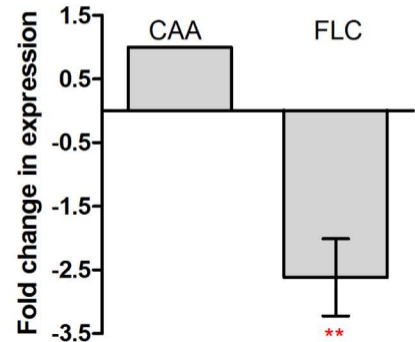

B

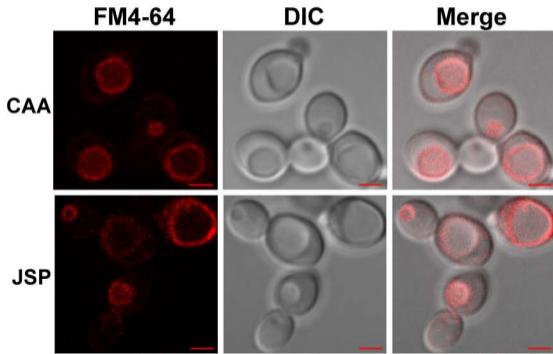

Figure S4

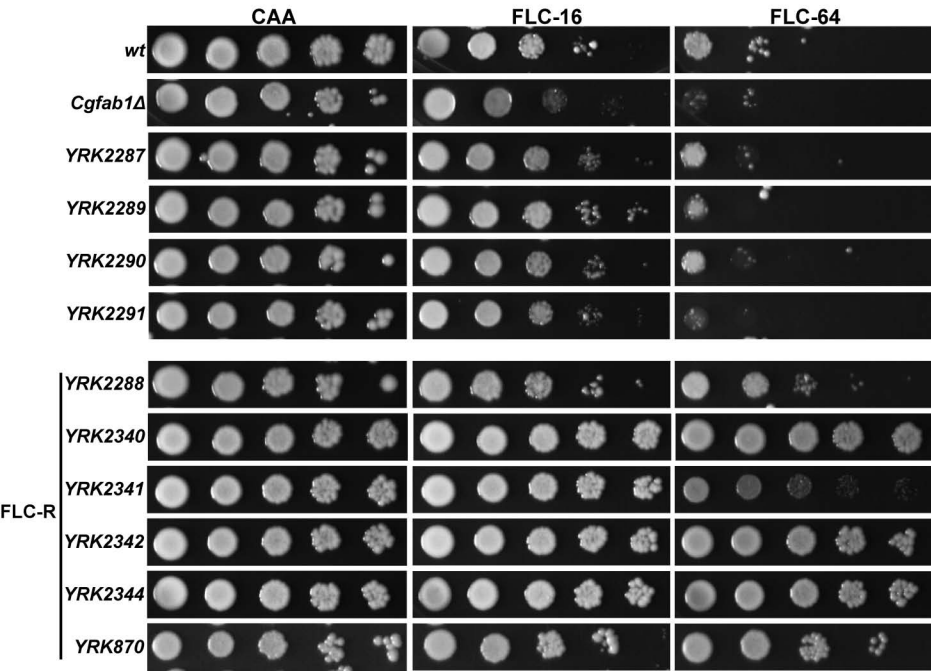



A

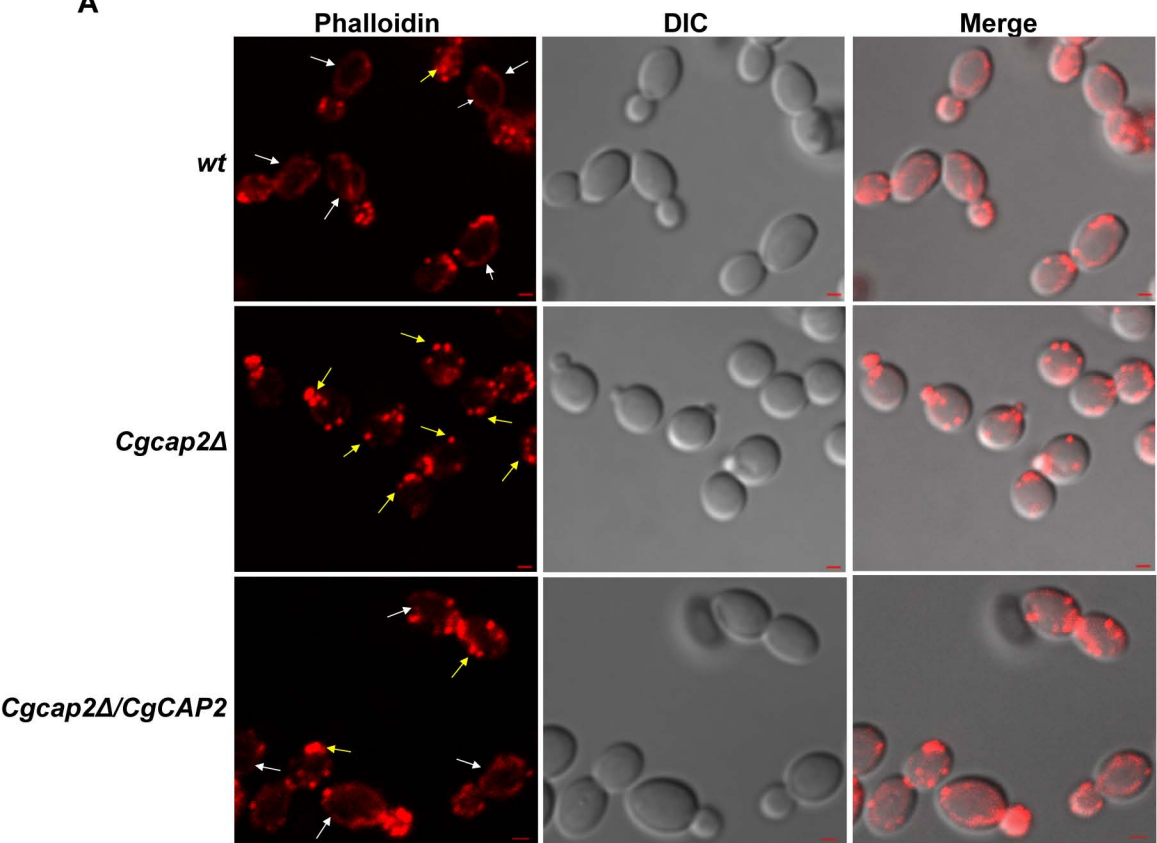

B

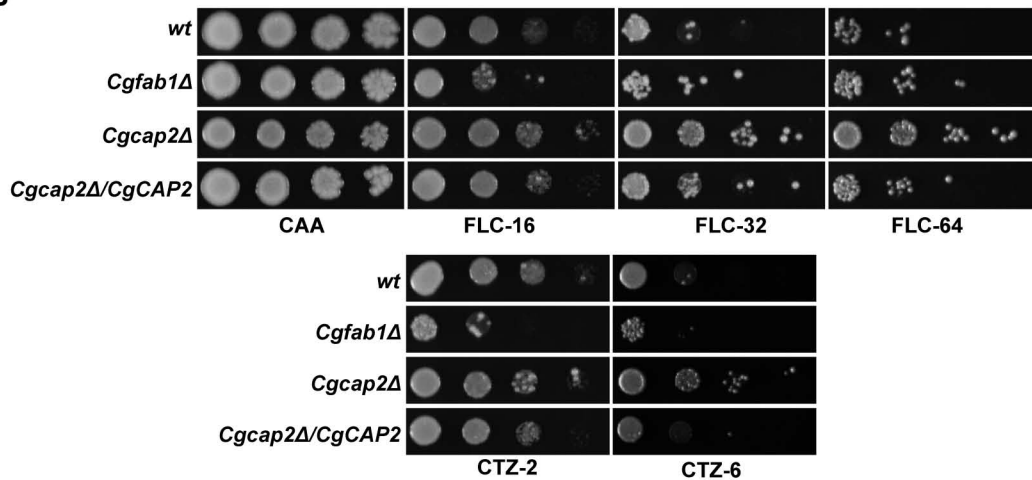

Figure S6

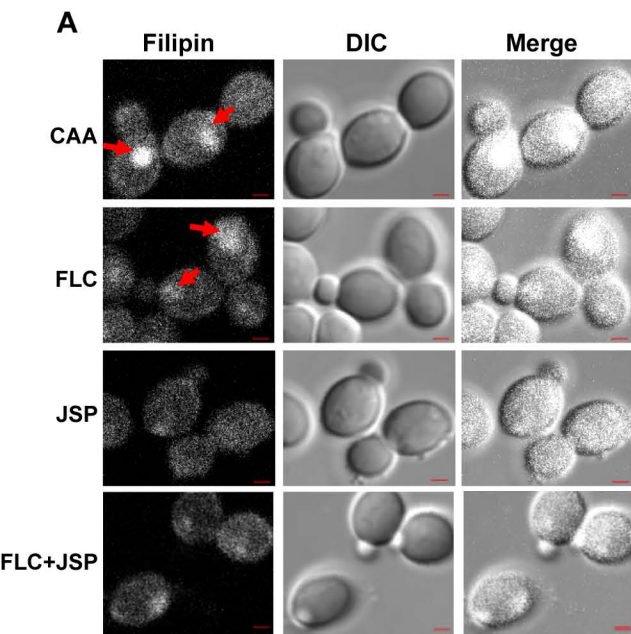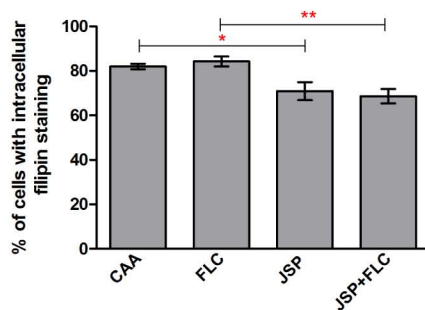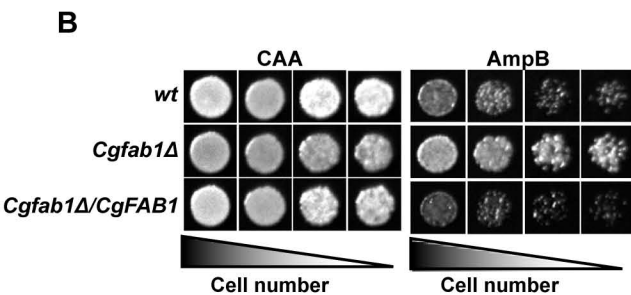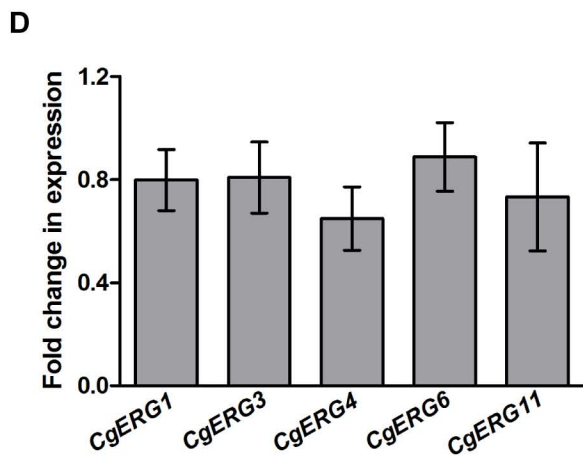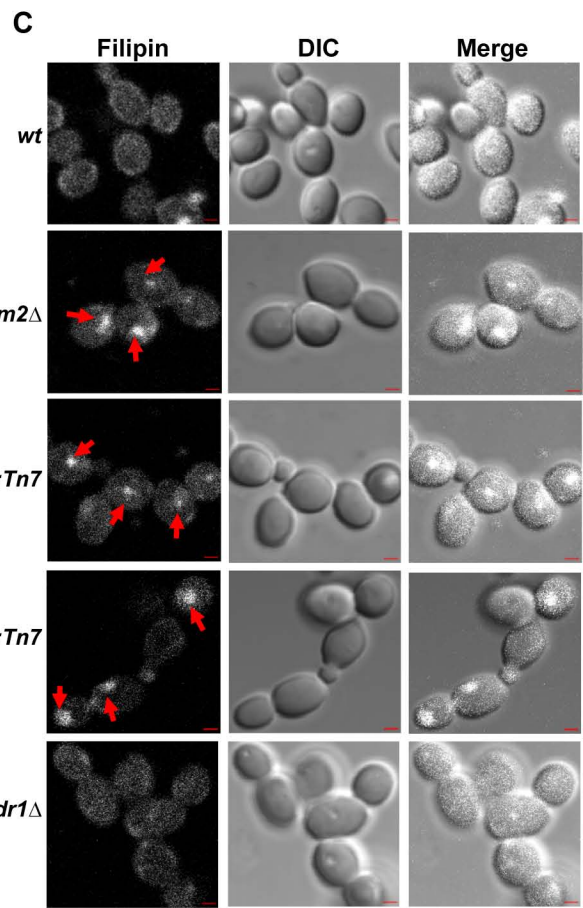

Figure S7

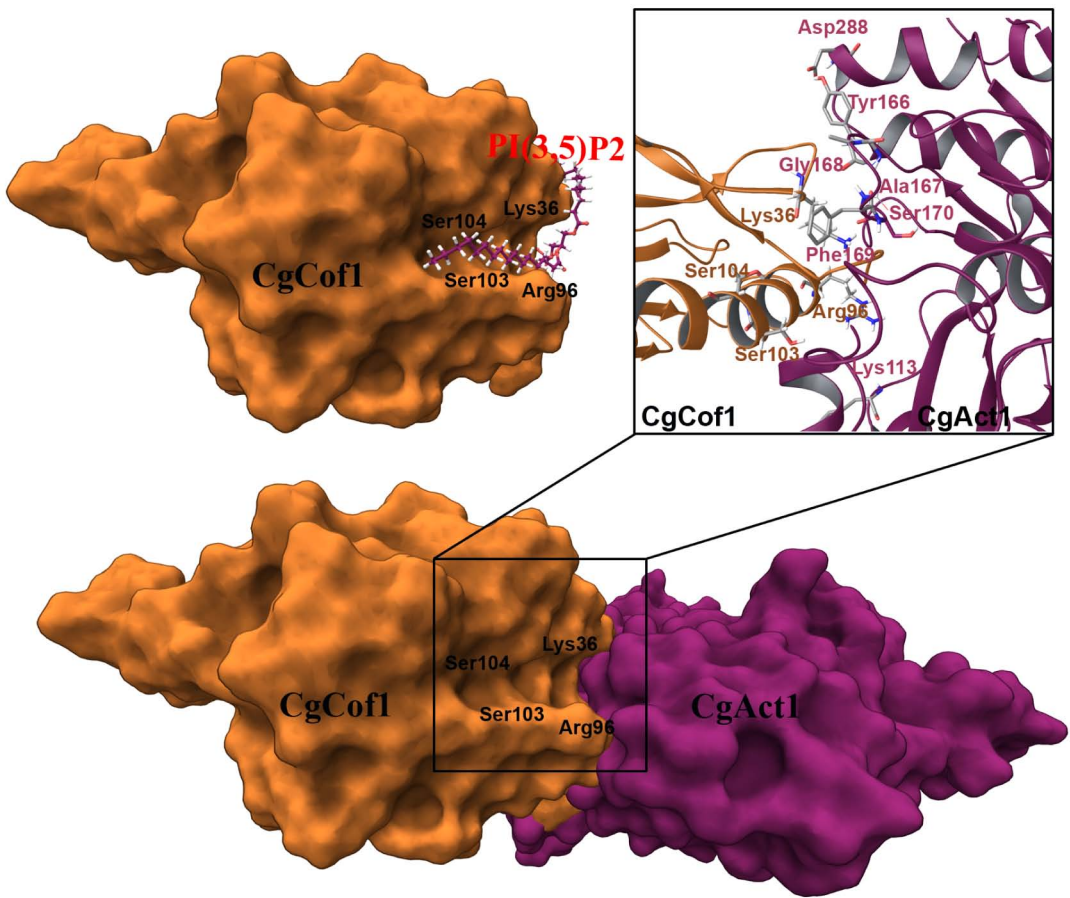

Figure S8

A

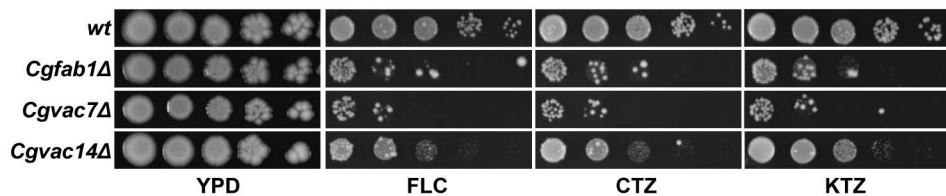

B

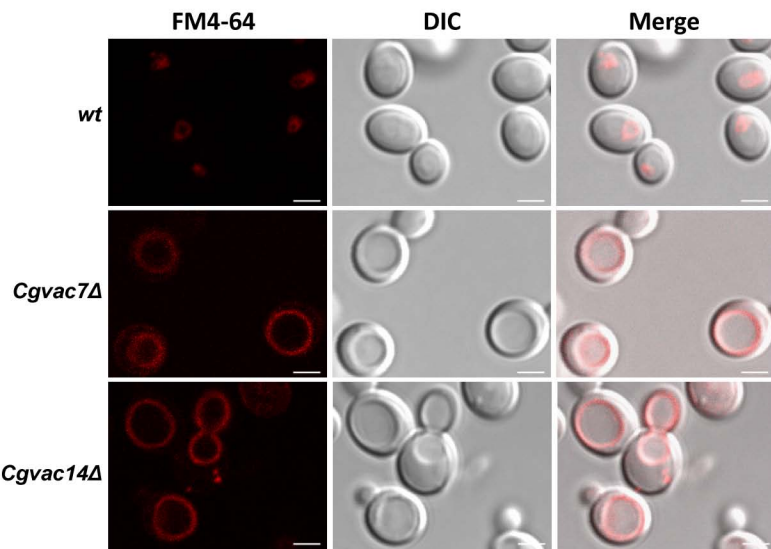

C

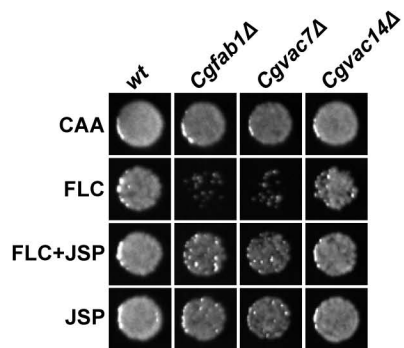

Supplement: MMI-110-425-s001.pdf [file MMI-110-425-s001.pdf]
